# Supplementary material for: Effects of Functional Interactivity on Patients’ Knowledge, Empowerment, and Health Outcomes: An Experimental Model-Driven Evaluation of a Web-Based Intervention
Source: PubMed Central journal article supplement (PMC3409610; doi:10.2196/jmir.1953), 2012-07-18
Supplement: jmir_v14i4e105_app2.pdf [file jmir_v14i4e105_app2.pdf]

## MULTIMEDIA APPENDIX 2

### Model of the effect of interactivity on knowledge.

---

| <b>Endogenous variable</b>   | <i>Standardized</i> |                | <i>Explained</i>                |          |
|------------------------------|---------------------|----------------|---------------------------------|----------|
|                              | <i>Disturbance</i>  |                | <i>Variance (R<sup>2</sup>)</i> |          |
| Knowledge T2                 | .52                 |                | .48                             |          |
| HO T2                        | .49                 |                | .51                             |          |
| <br><b>Structural model</b>  |                     |                |                                 |          |
| <i>Effects</i>               | <i>B</i>            | <i>P value</i> | <i>B 95% CI</i>                 | <i>b</i> |
| Knowledge T1 to Knowledge T2 | .65                 | < .001         | .52 to .76                      | .69      |
| Age to Knowledge T2          | .00                 | .84            | -.002 to .002                   | -.01     |
| YD to Knowledge T2           | -.00                | .44            | -.005 to .002                   | -.04     |
| HO T1 to HO T2               | .68                 | < .001         | .57 to .79                      | .69      |
| Knowledge T2 to HO T2        | -1.3                | .02            | -2.4 to -0.2                    | -.12     |
| <i>Mean differences</i>      |                     |                |                                 |          |
| G1 vs. G2                    | -.01                | .54            | -0.6 to .03                     | -        |
| G1 vs. G3                    | -.02                | .38            | -.07 to .03                     | -        |
| G2 vs. G3                    | -.00                | .79            | -.05 to .00                     | -        |

*Notes:*

T1 = pre-test, T2 = post-test, YD = years since first diagnosis, HO = health outcomes, G1/G2/G3 = experimental groups, B = unstandardized coefficient, b = standardized coefficient, CI = confidence interval.

Bollen-Stine p-value = .993; CFI = 1; RMSEA = 0; p-value for close fit = .995; Standardized RMR = .007. No theoretically meaningful modification indices > 4 and no values > 1.96 in the standardized residuals covariance matrix.

---
