# Supplementary material for: Effects of Functional Interactivity on Patients’ Knowledge, Empowerment, and Health Outcomes: An Experimental Model-Driven Evaluation of a Web-Based Intervention
Source: PubMed Central journal article supplement (PMC3409610; doi:10.2196/jmir.1953), 2012-07-18
Supplement: jmir_v14i4e105_app4.pdf [file jmir_v14i4e105_app4.pdf]

## MULTIMEDIA APPENDIX 4

### Model of the effect of interactivity on competence.

---

| <b>Endogenous variable</b>     | <i>Standardized<br/>Disturbance</i> |                |                 |  | <i>Explained<br/>Variance (R<sup>2</sup>)</i> |          |
|--------------------------------|-------------------------------------|----------------|-----------------|--|-----------------------------------------------|----------|
| Competence T2                  | .51                                 |                |                 |  | .49                                           |          |
| HO T2                          | .50                                 |                |                 |  | .50                                           |          |
| <br>                           |                                     |                |                 |  |                                               |          |
| <b>Measurement model</b>       | <i>Loading</i>                      |                |                 |  | <i>Reliability</i>                            |          |
| L Competence T1 to Item1 T1    | .85                                 |                |                 |  | .72                                           |          |
| L Competence T1 to Item2 T1    | .89                                 |                |                 |  | .79                                           |          |
| L Competence T1 to Item3 T1    | .57                                 |                |                 |  | .32                                           |          |
| L Competence T2 to Item1 T2    | .86                                 |                |                 |  | .73                                           |          |
| L Competence T2 to Item2 T2    | .93                                 |                |                 |  | .86                                           |          |
| L Competence T2 to Item3 T2    | .61                                 |                |                 |  | .37                                           |          |
| <br>                           |                                     |                |                 |  |                                               |          |
| <b>Structural model</b>        |                                     |                |                 |  |                                               |          |
| <i>Effects</i>                 | <i>B</i>                            | <i>P value</i> | <i>B 95% CI</i> |  |                                               | <i>b</i> |
| Competence T1 to Competence T2 | .61                                 | < .001         | .44 to .77      |  |                                               | .68      |
| Age to Competence T2           | -.016                               | .06            | -.03 to .007    |  |                                               | -.11     |
| YD to Competence T2            | -.02                                | .10            | -.06 to .01     |  |                                               | -.10     |
| HO T1 to HO T2                 | .67                                 | < .001         | .56 to .78      |  |                                               | .68      |
| Competence T2 to HO T2         | -.14                                | .08            | -.29 to .02     |  |                                               | -.10     |
| <i>Mean differences</i>        |                                     |                |                 |  |                                               |          |
| G1 vs. G2                      | -.09                                | .71            | -.50 to .42     |  |                                               | -        |
| G1 vs. G3                      | .09                                 | .39            | -.27 to .47     |  |                                               | -        |
| G2 vs. G3                      | .18                                 | .24            | -.27 to .60     |  |                                               | -        |

*Notes:*

PT = product-term, T1 = pre-test, T2 = post-test, YD = years since first diagnosis, HO = health outcomes, G1/G2/G3 = experimental groups, B = unstandardized coefficient, b = standardized coefficient, CI = confidence interval.

Bollen-Stine p-value = .09; CFI = .978; RMSEA = .051; p-value for close fit = .445; Standardized RMR = .043. No theoretically meaningful modification indices > 4 and no values > 1.96 in the standardized residuals covariance matrix.

---
