# Supplementary material for: Effects of Functional Interactivity on Patients’ Knowledge, Empowerment, and Health Outcomes: An Experimental Model-Driven Evaluation of a Web-Based Intervention
Source: PubMed Central journal article supplement (PMC3409610; doi:10.2196/jmir.1953), 2012-07-18
Supplement: jmir_v14i4e105_app6.pdf [file jmir_v14i4e105_app6.pdf]

## MULTIMEDIA APPENDIX 6

### Model of the effect of interactivity on impact.

---

| <b>Endogenous variable</b> | <i>Standardized<br/>Disturbance</i> |                |                 |          | <i>Explained<br/>Variance (R<sup>2</sup>)</i> |
|----------------------------|-------------------------------------|----------------|-----------------|----------|-----------------------------------------------|
| Impact T2                  | .44                                 |                |                 |          | .56                                           |
| HO T2                      | .47                                 |                |                 |          | .53                                           |
| <br>                       |                                     |                |                 |          |                                               |
| <b>Measurement model</b>   | <i>Loading</i>                      |                |                 |          | <i>Reliability</i>                            |
| L Impact T1 to Item1 T1    | .83                                 |                |                 |          | .68                                           |
| L Impact T1 to Item2 T1    | .82                                 |                |                 |          | .67                                           |
| L ImpactT1 to Item3 T1     | .93                                 |                |                 |          | .86                                           |
| L Impact T2 to Item1 T2    | .80                                 |                |                 |          | .64                                           |
| L Impact T2 to Item2 T2    | .83                                 |                |                 |          | .68                                           |
| L Impact T2 to Item3 T2    | .89                                 |                |                 |          | .79                                           |
| <br>                       |                                     |                |                 |          |                                               |
| <b>Structural model</b>    |                                     |                |                 |          |                                               |
| <i>Effects</i>             | <i>B</i>                            | <i>P value</i> | <i>B 95% CI</i> | <i>b</i> |                                               |
| Impact T1 to Impact T2     | .53                                 | < .001         | .41 to .66      | .71      |                                               |
| Age to Impact T2           | -.007                               | .34            | -.02 to .008    | -.05     |                                               |
| YD to Impact T2            | -.04                                | .007           | -.08 to -.004   | -.16     |                                               |
| HO T1 to HO T2             | .60                                 | < .001         | .48 to .72      | .62      |                                               |
| Impact T2 to HO T2         | -3.4                                | < .001         | -5.2 to -1.8    | -.25     |                                               |
| <i>Mean differences</i>    |                                     |                |                 |          |                                               |
| G1 vs. G2                  | -.04                                | .54            | -.18 to .10     | -        |                                               |
| G1 vs. G3                  | -.10                                | .11            | -.03 to .25     | -        |                                               |
| G2 vs. G3                  | .15                                 | .03            | .009 to .27     | -        |                                               |

*Notes:*

T1 = pre-test, T2 = post-test, YD = years since first diagnosis, HO = health outcomes, G1/G2/G3 = experimental groups, B = unstandardized coefficient, b = standardized coefficient, CI = confidence interval.

Bollen-Stine p-value = .19; CFI = .967; RMSEA = .071; p-value for close fit = .098; Standardized RMR = .044. No theoretically meaningful modification indices > 4 and no values > 1.96 in the standardized residuals covariance matrix.

---
