# Supplementary material for: Effects of Functional Interactivity on Patients’ Knowledge, Empowerment, and Health Outcomes: An Experimental Model-Driven Evaluation of a Web-Based Intervention
Source: J Med Internet Res. 2012 Jul 18;14(4):e105. doi: 10.2196/jmir.1953 (PMC3409610; doi:10.2196/jmir.1953)
Supplement: Supplementary file 3 [file jmir_v14i4e105_app3.pdf]

## MULTIMEDIA APPENDIX 3

### Model of the effect of interactivity on meaning.

| Endogenous variable      | Standardized<br>Disturbance | Explained<br>Variance ( $R^2$ ) |              |      |
|--------------------------|-----------------------------|---------------------------------|--------------|------|
| Meaning T2               | .48                         | .52                             |              |      |
| HO T2                    | .47                         | .53                             |              |      |
| Measurement model        | Loading                     | Reliability                     |              |      |
| L Meaning T1 to Item1 T1 | .78                         | .60                             |              |      |
| L Meaning T1 to Item2 T1 | .85                         | .72                             |              |      |
| L Meaning T1 to Item3 T1 | .82                         | .67                             |              |      |
| L Meaning T2 to Item1 T2 | .70                         | .50                             |              |      |
| L Meaning T2 to Item2 T2 | .88                         | .77                             |              |      |
| L Meaning T2 to Item3 T2 | .87                         | .75                             |              |      |
| Structural model         |                             |                                 |              |      |
| Effects                  | B                           | P value                         | B 95% CI     | b    |
| Meaning T1 to Meaning T2 | .53                         | < .001                          | .31 to .79   | .67  |
| Age to Meaning T2        | -.009                       | .06                             | -.02 to .002 | -.12 |
| YD to Meaning T2         | -.007                       | .43                             | -.04 to .12  | -.04 |
| HO T1 to HO T2           | .68                         | < .001                          | .58 to .78   | .69  |
| Meaning T2 to HO T2      | -.49                        | < .001                          | -.91 to -.22 | -.20 |
| Mean differences         |                             |                                 |              |      |
| G1 vs. G2                | .07                         | .50                             | -.12 to .37  | -    |
| G1 vs. G3                | .21                         | .02                             | .01 to .48   | -    |
| G2 vs. G3                | .14                         | .14                             | -.14 to .40  | -    |

#### Notes:

PT = product-term, T1 = pre-test, T2 = post-test, YD = years since first diagnosis, HO = health outcomes, G1/G2/G3 = experimental groups, B = unstandardized coefficient, b = standardized coefficient, CI = confidence interval.

Bollen-Stine p-value = .618; CFI = .99; RMSEA = .035; p-value for close fit = .738; Standardized RMR = .032. No theoretically meaningful modification indices > 4 and no values > 1.96 in the standardized residuals covariance matrix.
