# Supplementary material for: Effects of Functional Interactivity on Patients’ Knowledge, Empowerment, and Health Outcomes: An Experimental Model-Driven Evaluation of a Web-Based Intervention
Source: J Med Internet Res. 2012 Jul 18;14(4):e105. doi: 10.2196/jmir.1953 (PMC3409610; doi:10.2196/jmir.1953)
Supplement: Supplementary file 5 [file jmir_v14i4e105_app5.pdf]

## MULTIMEDIA APPENDIX 5

### Model of the effect of interactivity on self-determination.

| Endogenous variable                 | Standardized<br>Disturbance | Explained<br>Variance (R <sup>2</sup> ) |              |      |
|-------------------------------------|-----------------------------|-----------------------------------------|--------------|------|
| Self-determination T2               | .48                         | .52                                     |              |      |
| HO T2                               | .51                         | .49                                     |              |      |
| Measurement model                   | Loading                     | Reliability                             |              |      |
| L Self-determination T1 to Item1 T1 | .75                         | .56                                     |              |      |
| L Self-determination T1 to Item2 T1 | .89                         | .79                                     |              |      |
| L Self-determination T1 to Item3 T1 | .80                         | .64                                     |              |      |
| L Self-determination T2 to Item1 T2 | .76                         | .57                                     |              |      |
| L Self-determination T2 to Item2 T2 | .91                         | .82                                     |              |      |
| L Self-determination T2 to Item3 T2 | .75                         | .56                                     |              |      |
| Structural model                    |                             |                                         |              |      |
| Effects                             | B                           | P value                                 | B 95% CI     | b    |
| Self-det. T1 to Self-det. T2        | .61                         | < .001                                  | .47 to .78   | .70  |
| Age to Self-determination T2        | -.01                        | .14                                     | -.005 to .03 | -.09 |
| YD to Self-determination T2         | -.003                       | .86                                     | -.03 to .03  | -.01 |
| HO T1 to HO T2                      | .68                         | < .001                                  | .56 to .80   | .69  |
| Self-determination T2 to HO T2      | -.06                        | .40                                     | -.23 to .10  | -.05 |
| Mean differences                    |                             |                                         |              |      |
| G1 vs. G2                           | -.33                        | .10                                     | -.73 to .04  | -    |
| G1 vs. G3                           | -.18                        | .36                                     | -.63 to .23  | -    |
| G2 vs. G3                           | .14                         | .48                                     | -.28 to .57  | -    |

#### Notes:

T1 = pre-test, T2 = post-test, YD = years since first diagnosis, HO = health outcomes, G1/G2/G3 = experimental groups, B = unstandardized coefficient, b = standardized coefficient, CI = confidence interval.

Bollen-Stine p-value = .09; CFI = .978; RMSEA = .053; p-value for close fit = .415; Standardized RMR = .046. No theoretically meaningful modification indices > 4 and no values > 1.96 in the standardized residuals covariance matrix.
