# Supplementary material for: Effects of Functional Interactivity on Patients’ Knowledge, Empowerment, and Health Outcomes: An Experimental Model-Driven Evaluation of a Web-Based Intervention
Source: J Med Internet Res. 2012 Jul 18;14(4):e105. doi: 10.2196/jmir.1953 (PMC3409610; doi:10.2196/jmir.1953)
Supplement: Supplementary file 7 [file jmir_v14i4e105_app7.pdf]

## MULTIMEDIA APPENDIX 7

### Summary of hypotheses tested and subsequent results.

| Hypothesis                                                                                                                                                                                      | Result        | Comment                                                                                                                                                                                                                       |
|-------------------------------------------------------------------------------------------------------------------------------------------------------------------------------------------------|---------------|-------------------------------------------------------------------------------------------------------------------------------------------------------------------------------------------------------------------------------|
| H1: Patients who used an application that offered interactive functions will become more knowledgeable than patients not offered this function.                                                 | Not confirmed | No effect of the different enabling features was found on knowledge.                                                                                                                                                          |
| H2: Patients who used an application that offered interactive functions will achieve a higher score on the empowerment dimension of meaning than patients not offered this function.            | Not confirmed | There is an effect of the different enabling features on the meaning score, but not in the predicted direction.<br>People in G3 scored significantly lower in meaning than people with the static version of the application. |
| H3: Patients who used an application that offered interactive functions will achieve a higher score on the empowerment dimension of competence than patients not offered this function.         | Not confirmed | No effect of the different enabling features was found on the competence score.                                                                                                                                               |
| H4: Patients who used an application that offered interactive functions will achieve a higher score on the empowerment dimension of self-determination than patients not offered this function. | Not confirmed | No effect of the different enabling features was found on the self-determination score.                                                                                                                                       |
| H5: Patients who used an application that offered interactive functions will achieve a higher score on the empowerment dimension of impact than patients not offered this function.             | Not confirmed | There is an effect of interactivity on the impact score, but people with the full-featured application scored lower on this outcome than people exposed to the interactive-only version of the intervention.                  |
| H6: The higher the knowledge of patients, the better (= lower) they assess their Fibromyalgia impact.                                                                                           | Confirmed     | Individual level of knowledge is associated with improved health outcomes.                                                                                                                                                    |
| H7: The higher the meaning score of patients, the better they assess their Fibromyalgia impact.                                                                                                 | Confirmed     | Individual meaning score is associated with improved health outcomes.                                                                                                                                                         |
| H8: The higher the competence score of patients, the better they assess their Fibromyalgia impact.                                                                                              | Not confirmed | The empowerment dimension of competence did not have an effect on                                                                                                                                                             |

|                                                                                                            |               |                                                                                                                |
|------------------------------------------------------------------------------------------------------------|---------------|----------------------------------------------------------------------------------------------------------------|
| H9: The higher the self-determination score of patients, the better they assess their Fibromyalgia impact. | Not confirmed | health outcomes.<br>The empowerment dimension of self-determination did not have an effect on health outcomes. |
| H10: The higher the impact score of patients, the better they assess their Fibromyalgia impact.            | Confirmed     | The empowerment dimension of impact had a very strong effect on health outcomes in the predicted direction.    |

---
